# Supplementary material
Source: PubMed Central journal article supplement (PMC4821829)
Supplement: NIHMS716603-supplement-1.pdf [file NIHMS716603-supplement-1.pdf]

# **Antimalarial Induced Cancer Cell Death Requires Oxidative Pentose Phosphate Pathway Inhibition**

Eduardo Salas<sup>1</sup>, Srirupa Roy<sup>1</sup>, Timothy Marsh<sup>1</sup>, Brian Rubin<sup>2</sup> and Jayanta Debnath<sup>1,\*</sup>

<sup>1</sup>Department of Pathology and Helen Diller Family Comprehensive Cancer Center, University of California, San Francisco, CA 94143, USA.

<sup>2</sup>Departments of Anatomic Pathology and Molecular Genetics, Cleveland Clinic, Cleveland, OH 44195, USA.

\*Correspondence to: [jayanta.debnath@ucsf.edu](mailto:jayanta.debnath@ucsf.edu)

## **SUPPLEMENTARY MATERIALS:**

## **SUPPLEMENTARY FIGURES:**

Supplementary Figure 1: ATG7 and ATG12 depletion do not induce apoptosis in NSCLC cells.

Supplementary Figure 2: Analysis of the effects of antimalarial treatment on xenograft tumors and normal tissues *in vivo*.

Supplementary Figure 3: Validation of ATG7 and G6PD knockdown in NSCLC cells.

Supplementary Figure 4: Effects of Q on LC3-II accumulation and p53 induction in NSCLC cells.

Supplementary Figure 5: Apoptosis upon combined knockdown of ATG7 and G6PD in p53 null NSCLC cells.

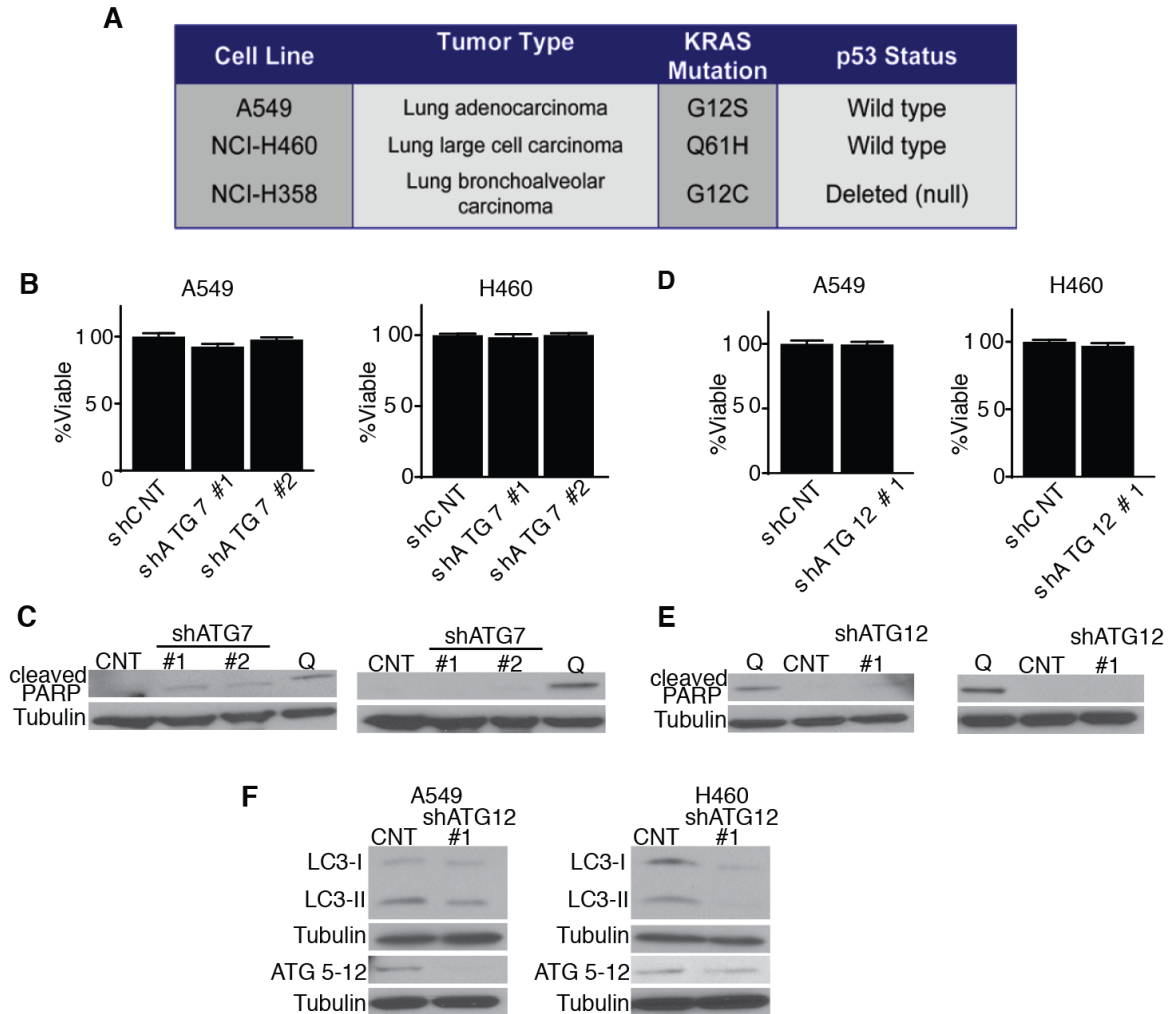

**Supplementary Figure 1: ATG7 and ATG12 depletion do not induce apoptosis in NSCLC cells. (A)** K-Ras mutation status and p53 status in NSCLC lines used in this study. **(B, C)** Effects of ATG7 knockdown on A549 or H460 cell survival, assayed via trypan blue exclusion. Immunoblotting for cleaved PARP shows minimal apoptosis in ATG7 depleted cells. Treatment with 5  $\mu$ M Q was used as a positive control. **(D, E)** Effects of ATG12 knockdown on H460 or A549 cell survival, assayed via trypan blue exclusion. Immunoblotting for cleaved PARP shows minimal apoptosis in ATG12 depleted cells. Treatment with 5  $\mu$ M Q served as a positive control. **(F)** Immunoblotting for LC3-II and ATG5-ATG12 complex upon depletion of ATG12. All data represent mean  $\pm$  SEM from 3 independent experiments.

Statistical significance was calculated using ANOVA followed by Tukey's HSD and found to be non-significant.

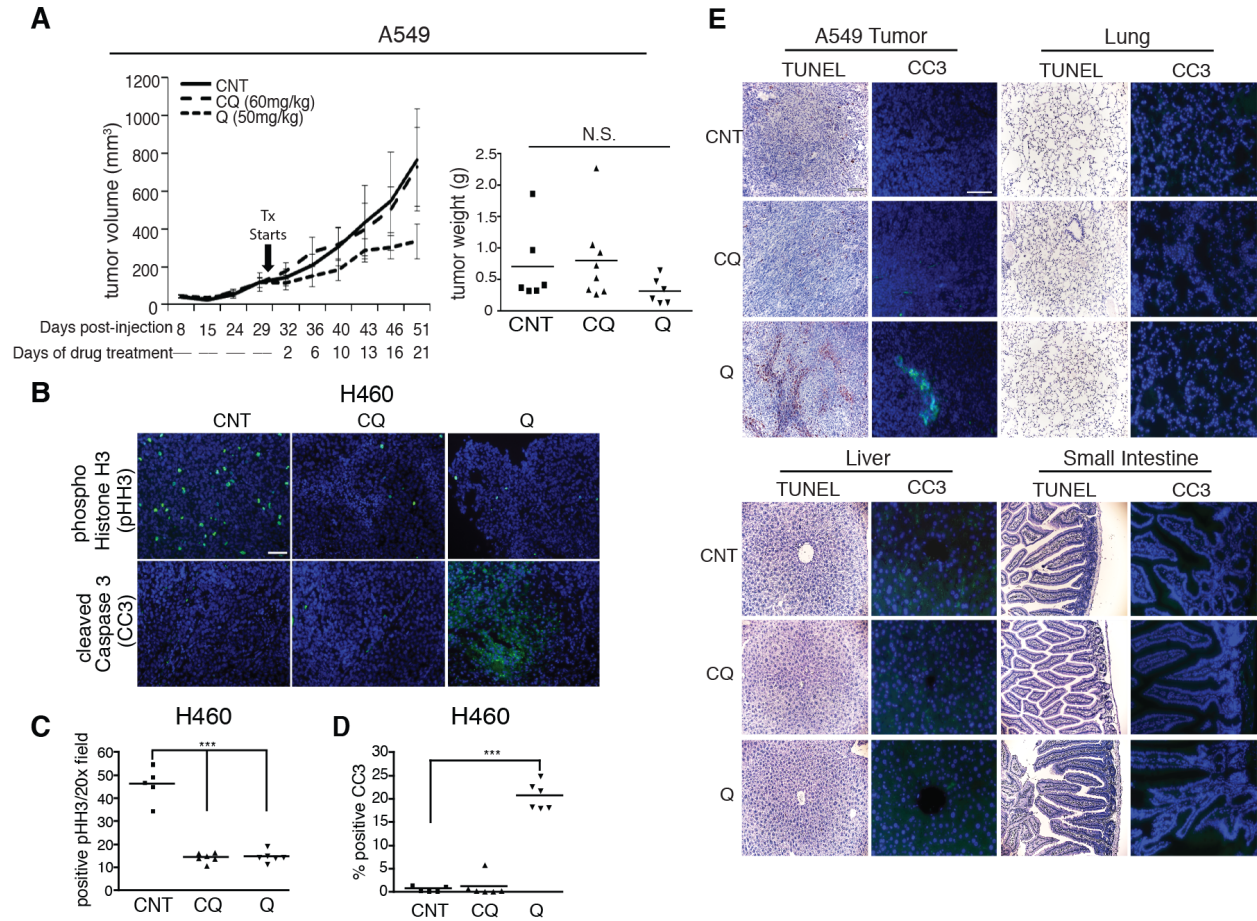

**Supplementary Figure 2: Analysis of the effects of antimalarial treatment on xenograft tumors and normal tissues *in vivo*.** (A) Left: Tumor volume was measured on the indicated days in A549 xenograft tumors treated with vehicle (CNT, water), CQ and Q. Right: Tumor weights from individual mice following 21 days of treatment. Data represent mean  $\pm$  SEM from 6 independent tumors for each cohort. Statistical significance was calculated using ANOVA followed by Tukey's HSD. N.S.=nonsignificant. (B) Immunostaining for phospho-histone H3 (pHH3, proliferation marker) and cleaved caspase-3 (CC3, apoptosis marker) of H460 lung tumor xenografts treated with CQ and Q. Bar, 100 $\mu$ m. (C, D) Quantification of pHH3 (C) and CC3 (D) positive cells. Data are the mean  $\pm$  SEM from 6 independent tumors for each condition. Statistical significance was calculated using ANOVA followed by Tukey's HSD. \*\*\* $P \leq 0.001$ . (E) TUNEL staining and immunostaining for cleaved caspase-3 (CC3) in A549

xenograft tumors, lung, liver and small intestine from tumor-bearing mice treated with vehicle (CNT, water), CQ and Q. Bar, 100 $\mu$ m.

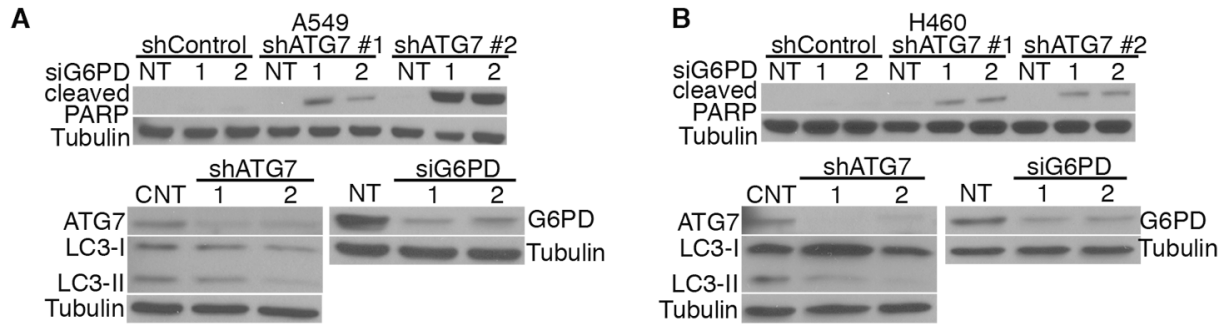

**Supplementary Figure 3: Validation of ATG7 and G6PD knockdown in NSCLC cells. (A, B)** Immunoblotting for cleaved PARP, ATG7, G6PD and LC3-II after siRNA-mediated depletion of G6PD and shRNA knockdown of ATG7 in A549 (A) and H460 (B) cells.

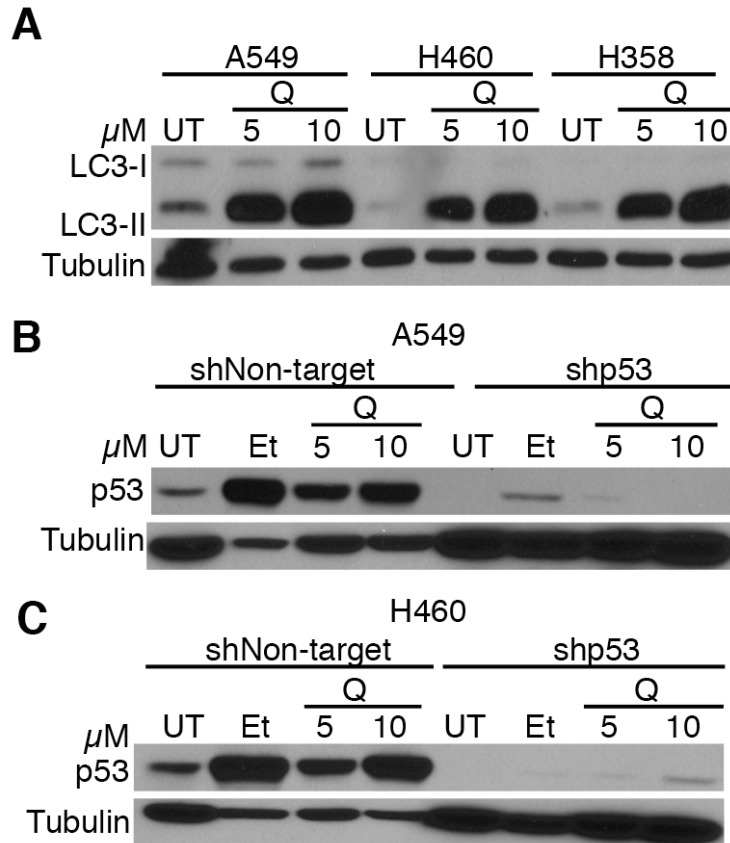

**Supplementary Figure 4: Effects of Q on LC3-II accumulation and p53 induction in NSCLC cells.**

(A) LC3-II accumulation following 18 h Q treatment at the indicated doses in A549, H460 and H358 cells. (B, C) p53 protein levels following shRNA mediated p53 knockdown in A549 (B) and H460 (C) cells in response to the indicated doses of Q for 18 h. Et=50 $\mu\text{M}$  etoposide (positive control).

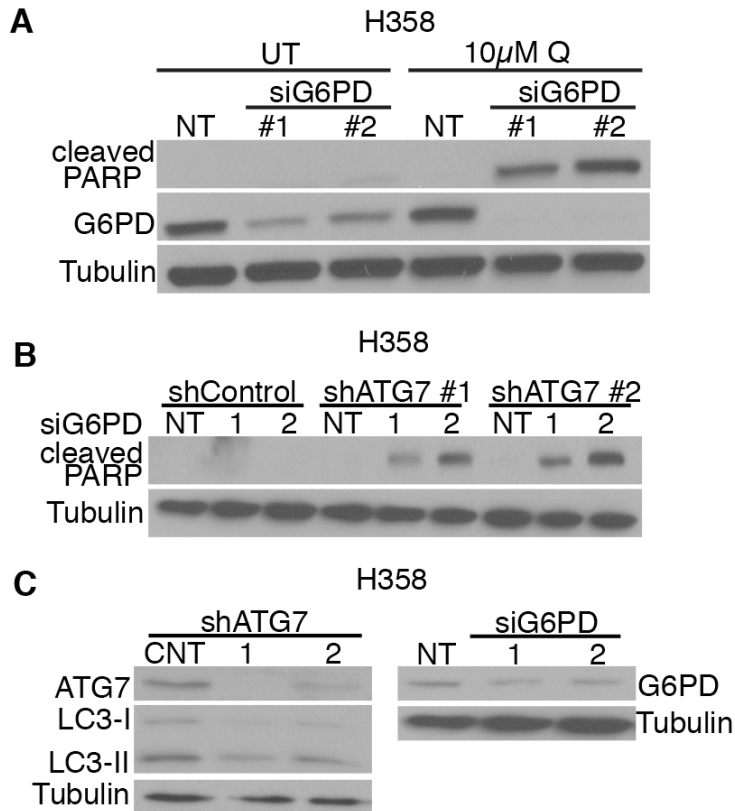

**Supplementary Figure 5: Apoptosis upon combined knockdown of ATG7 and G6PD in p53 null NSCLC cells.** (A) Immunoblotting for cleaved PARP in H358 cells following siRNA-mediated knockdown of G6PD and treatment with 10  $\mu$ M Q for 18 h. UT=untreated. (B) Immunoblotting for cleaved PARP after RNAi-mediated knockdown of G6PD and shRNA depletion of ATG7 in H358 cells. (C) Immunoblotting for ATG7, LC3-II and G6PD in H358 cells.
